# Supplementary material for: Novel thermally self-crosslinkable diarylfluorene-based copolymers for efficient and stable blue light-emitting diodes
Source: Royal Society of Chemistry journal article supplement (doi:10.1039/d0tc01952f), 2020-01-01
Supplement: d0tc01952f1.pdf [file d0tc01952f1.pdf]

## Supplementary Information

# Novel thermally self-crosslinkable diaryluorene-based copolymers for efficient and stable blue light-emitting diodes

Alei Liu,<sup>a,#</sup> Zhe Liu,<sup>ab,#</sup> Hong Lin,<sup>c</sup> Wenwei Tang,<sup>a</sup> Zesen Lin,<sup>a</sup> Weina Zhang,<sup>a</sup>

Zhengjian Qi,<sup>b</sup> Xiaofei Gu,<sup>b</sup> Yueqi Mo,<sup>\*,c</sup> Lintao Hou<sup>\*,a</sup>

<sup>a</sup> *Guangdong Provincial Key Laboratory of Optical Fiber Sensing and Communications, Guangzhou Key*

*Laboratory of Vacuum Coating Technologies and New Energy Materials, Guangdong Provincial Engineering*

*Technology Research Center of Vacuum Coating Technologies and New Energy Materials, Siyuan Laboratory,*

*Department of Physics, Jinan University, Guangzhou 510632, PR China. Email: thlt@jnu.edu.cn*

<sup>b</sup> *Jiangsu Province Hi-Tech Key Laboratory for Biomedical Research, School of College of Chemistry and*

*Chemical Engineering, Southeast University, Nanjing 211189, PR China*

<sup>c</sup> *Key Laboratory of Special Functional Materials, South China University of Technology, Guangzhou 510640, PR*

*China. Email: pomoy@scut.edu.cn*

<sup>#</sup> *These authors contributed to the work equally*

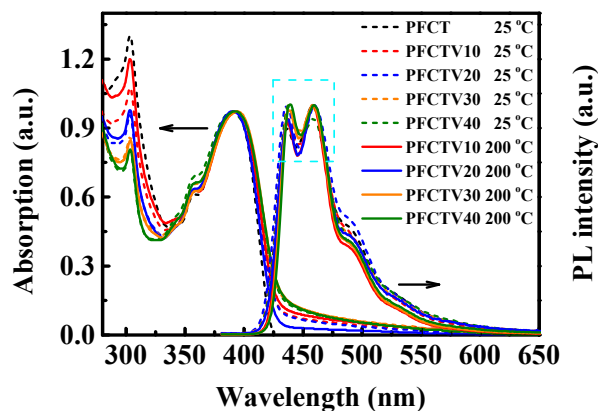

**Fig. S1** UV-vis absorption and PL spectra of PFCT and PFCTV10–40 films.

**Table S1.** Optical properties and energy levels of PFCT and PFCTV10–40 with and without thermal crosslinking.

| Polymers | $\lambda_{Abs, max}^a$ | $\lambda_{Abs, max}^b$ | $\lambda_{PL, max}^a$ | $\lambda_{PL, max}^b$ | $E_g^a/E_g^b$ | $E_{ox}$ | $E_{HOMO}^a/E_{HOMO}^b$ | $E_{LUMO}^a/E_{LUMO}^b$ |
|----------|------------------------|------------------------|-----------------------|-----------------------|---------------|----------|-------------------------|-------------------------|
|          | (nm)                   | (nm)                   | (nm)                  | (nm)                  | (eV)          | (eV)     | $E_{HOMO}^c$            | $E_{LUMO}^c$            |
| PFCT     | 303.5                  | 303.5                  | 435                   | 435                   | 2.98/2.98     | 0.99     | -5.39/-5.81/-           | -2.41/-2.83/-           |
|          | 391.0                  | 391.0                  | 457                   | 457                   |               |          |                         |                         |
| PFCTV10  | 303.5                  | 303.5                  | 436                   | 436                   | 2.96/2.96     | 0.97     | -5.37/-5.77/-5.75       | -2.41/-2.81/-2.79       |
|          | 391.5                  | 391.5                  | 458                   | 457                   |               |          |                         |                         |
| PFCTV20  | 303.5                  | 303.5                  | 436                   | 436                   | 2.95/2.96     | 0.95     | -5.35/-5.78/-5.69       | -2.40/-2.83/-2.73       |
|          | 391.5                  | 390.5                  | 459                   | 457                   |               |          |                         |                         |
| PFCTV30  | 303.5                  | 303.5                  | 436                   | 436                   | 2.93/2.94     | 0.94     | -5.34/-5.79/-5.77       | -2.41/-2.86/-2.83       |
|          | 391.5                  | 391.0                  | 459                   | 457                   |               |          |                         |                         |
| PFCTV40  | 303.5                  | 303.5                  | 439                   | 438                   | 2.93/2.94     | 0.96     | -5.36/-5.83/-5.81       | -2.43/-2.90/-2.87       |
|          | 391.5                  | 390.0                  | 459                   | 458                   |               |          |                         |                         |

$\lambda_{Abs, max}^a$ ,  $\lambda_{PL, max}^a$ ,  $\lambda_{Abs, max}^b$  and  $\lambda_{PL, max}^b$  are the main absorption and PL peaks of the films without/with annealing at 200 °C, respectively;

$E_g^a$  and  $E_g^b$  are the optical band gaps determined by the cut off of absorption spectra of the films without/with annealing at 200 °C, respectively;

$E_{HOMO}^a$  is calculated from the oxidation potentials  $E_{ox}$  from the *CV* curves with the equation of  $E_{HOMO}^a = -(E_{ox} + 4.4)$  eV and  $E_{LUMO}^a = E_{HOMO}^a + E_g^a$ ;

$E_{HOMO}^b$  and  $E_{HOMO}^c$  are calculated from secondary electrons cut-off edge and valence-band maximum of UPS of the un-crosslinked and crosslinked films, respectively;

$E_{LUMO}^b = E_{HOMO}^b + E_g^b$  and  $E_{LUMO}^c = E_{HOMO}^c + E_g^b$ .

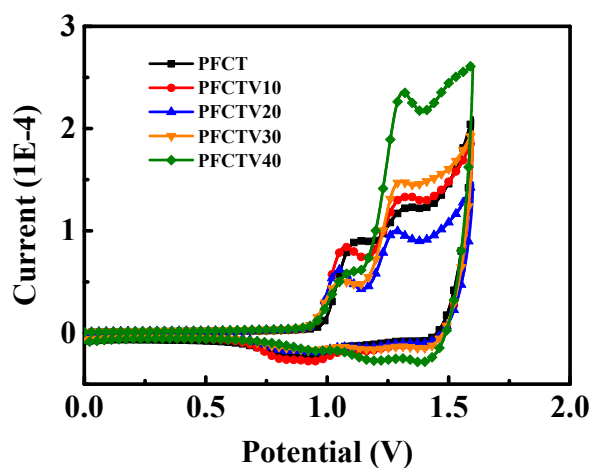

**Fig. S2** *CV* characteristics of PFCT and PFCTV10–40 polymers.

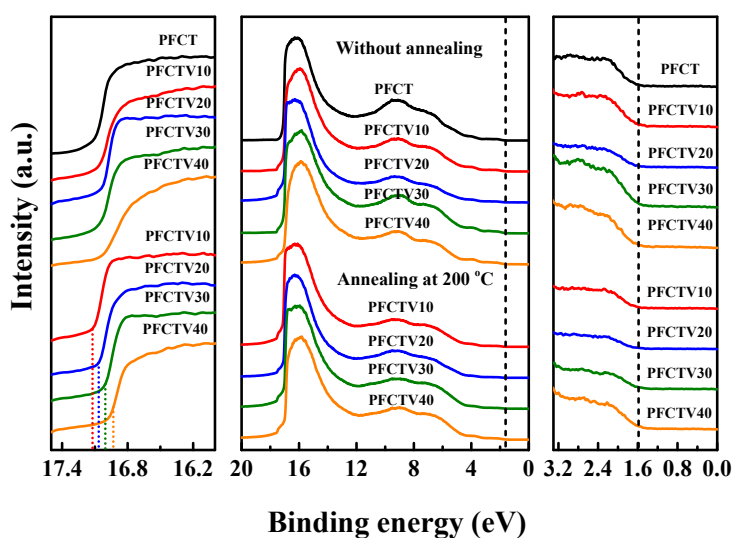

**Fig. S3** UPS spectra of PFCT and PFCTV10–40 films.

**Table S2.** Detailed parameters of PFCT and PFCTV20 devices at the current density of around 35 mA/cm<sup>2</sup>.

| Device  | Condition    | Voltage (V) | $J$ (mA/cm <sup>2</sup> ) | $L$ (cd/m <sup>2</sup> ) | $LE$ (cd/A) | $EQE$ (%) |
|---------|--------------|-------------|---------------------------|--------------------------|-------------|-----------|
| PFCT    | 25 °C        | 6           | 38.11                     | 959.61                   | 2.52        | 3.15      |
| PFCTV20 | 25 °C        | 7.2         | 30.64                     | 292.51                   | 0.95        | 1.19      |
| PFCTV20 | 200 °C-10min | 5.2         | 38.15                     | 1309.95                  | 3.43        | 4.29      |

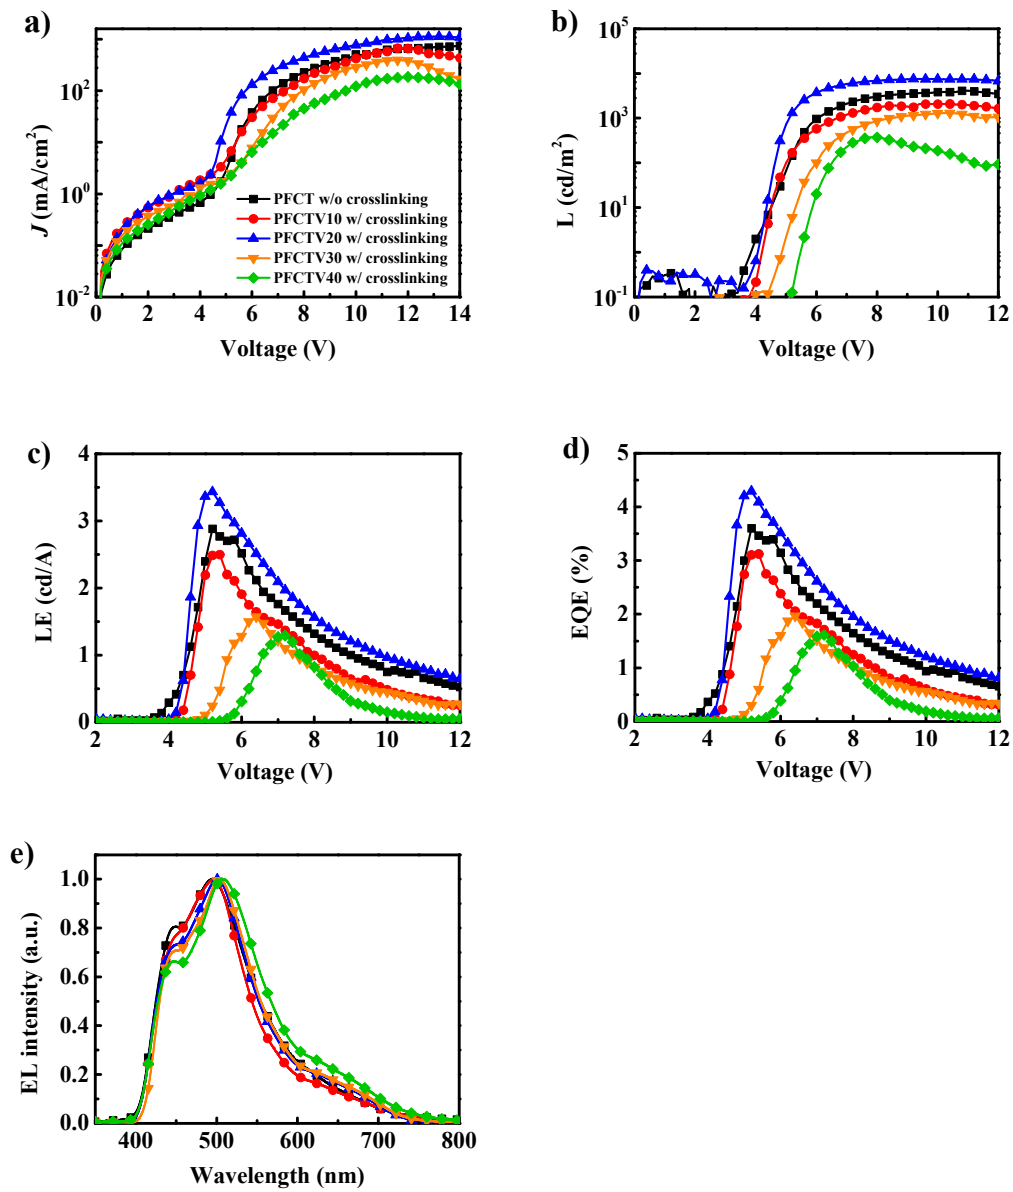

**Fig. S4**  $J$ - $V$ ,  $L$ - $V$ ,  $LE$ - $V$ ,  $EQE$ - $V$  characteristics and  $EL$  spectra of PFCT and PFCTV10–40 devices with thermal crosslinking at 200 °C.

**Table S3.** Detailed parameters of the PFCTV10–40 devices at the maximum  $LE$  and  $EQE$  under different crosslinking temperatures.

| <b>Device</b>  | <b>T</b><br>(°C) | <b><math>V_{on}</math></b><br>(V) | <b><i>Voltage</i></b><br>(V) | <b><math>J</math></b><br>(mA/cm <sup>2</sup> ) | <b><math>L</math></b><br>(cd/m <sup>2</sup> ) | <b><math>LE</math></b><br>(cd/A) | <b><math>EQE</math></b><br>(%) |
|----------------|------------------|-----------------------------------|------------------------------|------------------------------------------------|-----------------------------------------------|----------------------------------|--------------------------------|
| <b>PFCT</b>    | 25               | 3.9                               | 5.2                          | 5.05                                           | 145.7                                         | 2.88                             | 3.60                           |
| <b>PFCTV10</b> | 25               | 4.9                               | 6.8                          | 6.76                                           | 86.5                                          | 1.28                             | 1.60                           |
|                | 150              | 4.8                               | 6.4                          | 22.20                                          | 369.2                                         | 1.66                             | 2.08                           |
|                | 200              | 4.3                               | 5.4                          | 10.31                                          | 257.7                                         | 2.50                             | 3.12                           |
|                | 230              | 4.8                               | 6                            | 34.02                                          | 606.1                                         | 1.78                             | 2.23                           |
| <b>PFCTV20</b> | 25               | 5.4                               | 6.2                          | 2.58                                           | 56.2                                          | 2.17                             | 2.72                           |
|                | 150              | 5.0                               | 6.2                          | 8.03                                           | 187.5                                         | 2.33                             | 2.92                           |
|                | 200              | 4.3                               | 5.2                          | 38.15                                          | 1309.9                                        | 3.43                             | 4.29                           |
|                | 230              | 4.6                               | 6.8                          | 144.55                                         | 2321.8                                        | 1.61                             | 2.01                           |
| <b>PFCTV30</b> | 25               | 5.6                               | 8                            | 31.70                                          | 324.4                                         | 1.02                             | 1.28                           |
|                | 150              | 5.3                               | 7.2                          | 10.23                                          | 139.1                                         | 1.36                             | 1.70                           |
|                | 200              | 4.9                               | 6.4                          | 15.45                                          | 243.1                                         | 1.57                             | 1.97                           |
|                | 230              | 5.1                               | 7                            | 19.62                                          | 204.8                                         | 1.04                             | 1.30                           |
| <b>PFCTV40</b> | 25               | 5.7                               | 9.4                          | 879.31                                         | 3514.1                                        | 0.93                             | 1.17                           |
|                | 150              | 5.5                               | 7.2                          | 21.93                                          | 282.9                                         | 1.29                             | 1.61                           |
|                | 200              | 5.6                               | 8                            | 89.33                                          | 1010.8                                        | 1.13                             | 1.41                           |

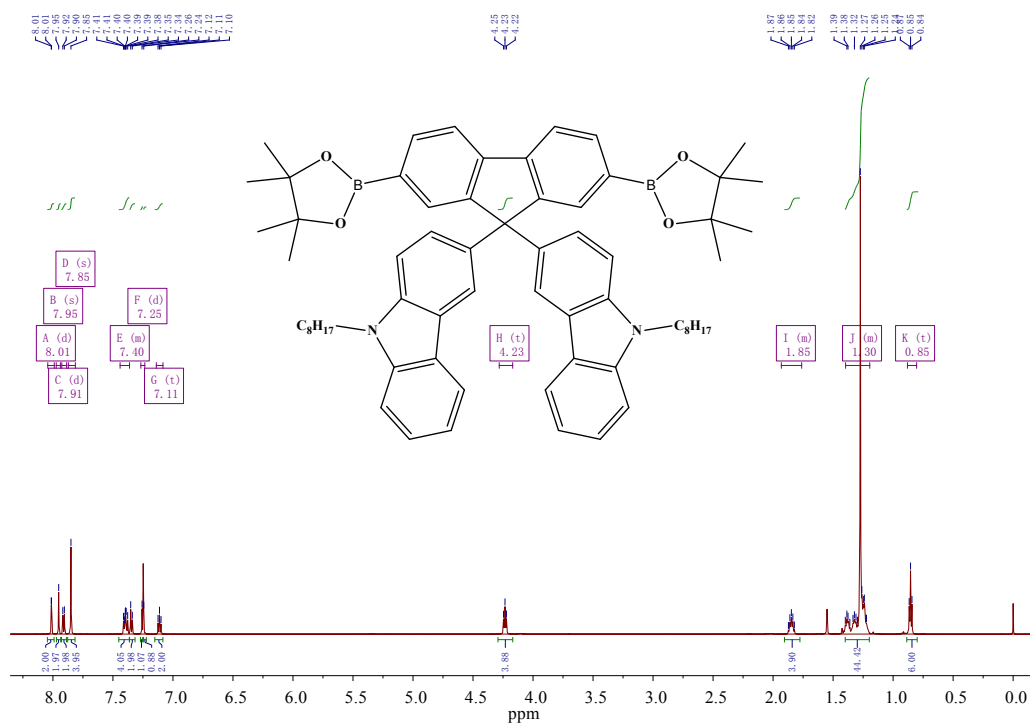

**Fig. S5**  $^1H$ -NMR of M1.

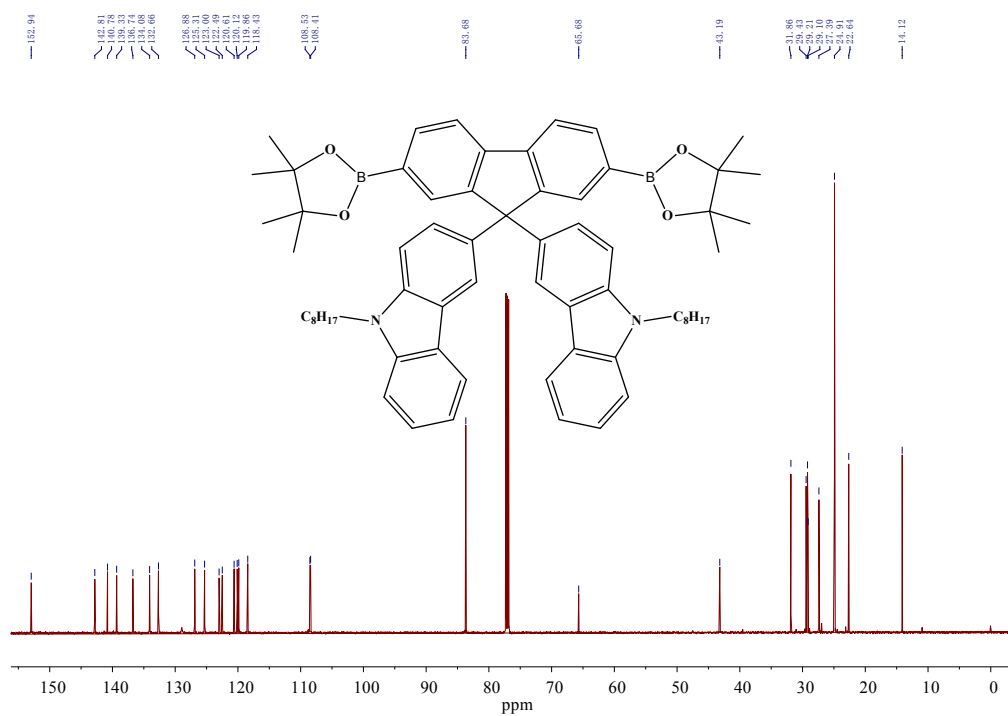

**Fig. S6**  $^{13}C$ -NMR of M1.

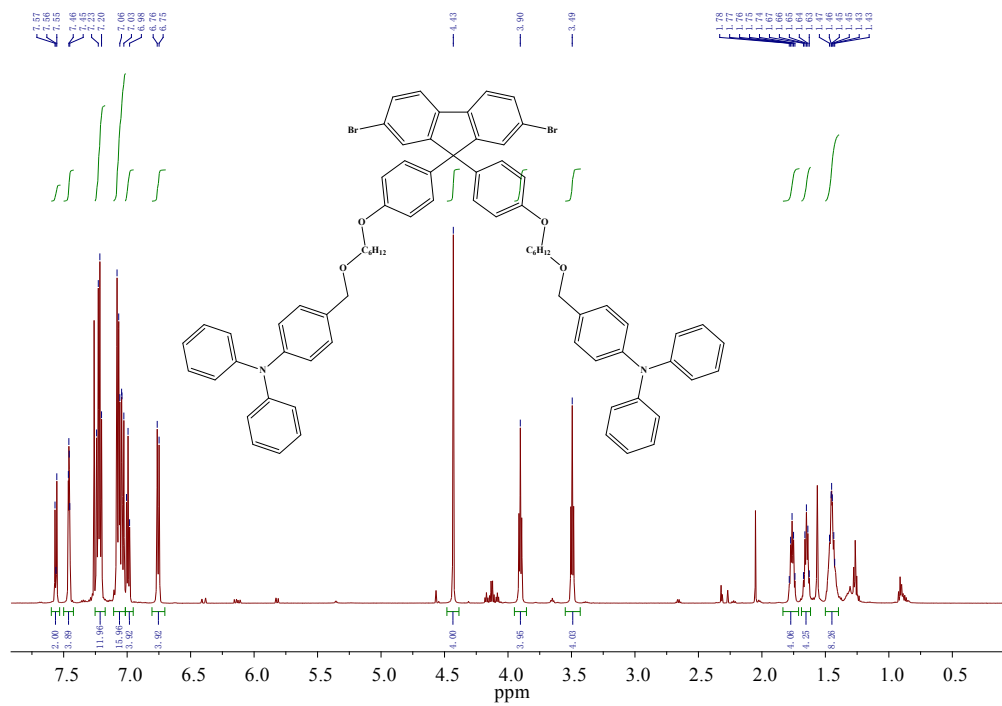

Fig. S7  $^1\text{H-NMR}$  of M2.

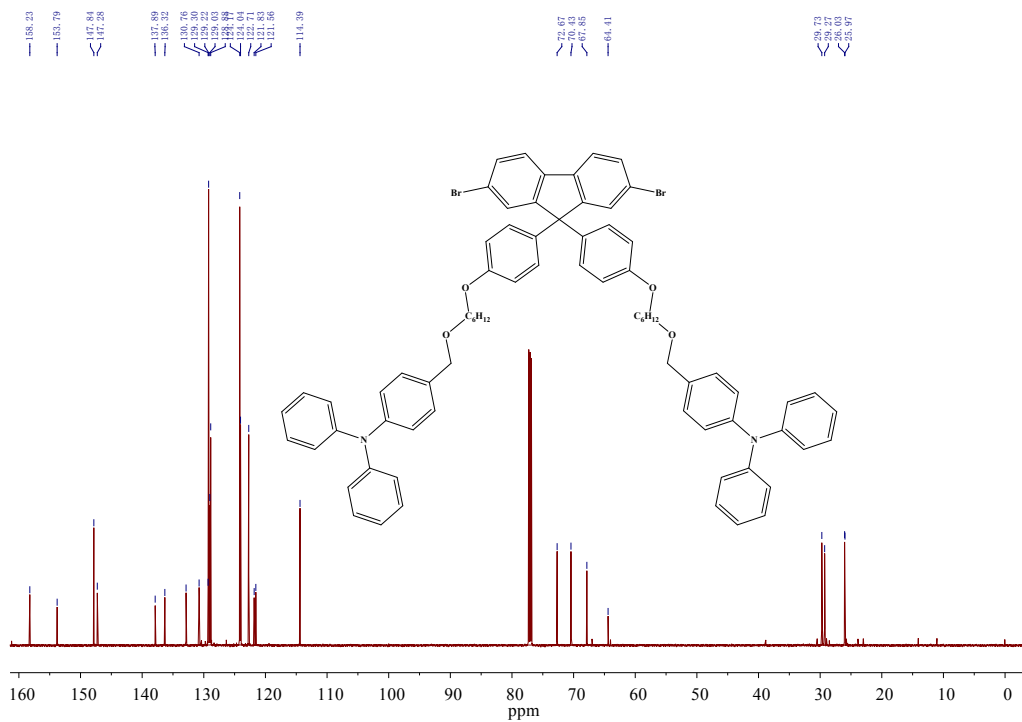

Fig. S8  $^{13}\text{C-NMR}$  of M2.

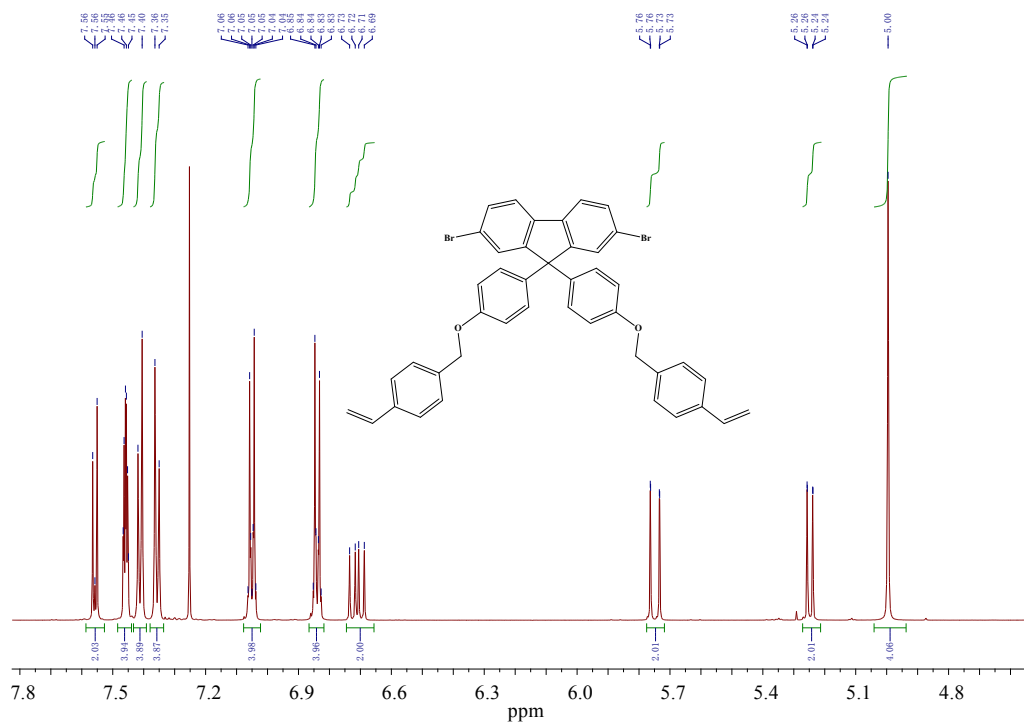

Fig. S9 <sup>1</sup>H-NMR of M3.

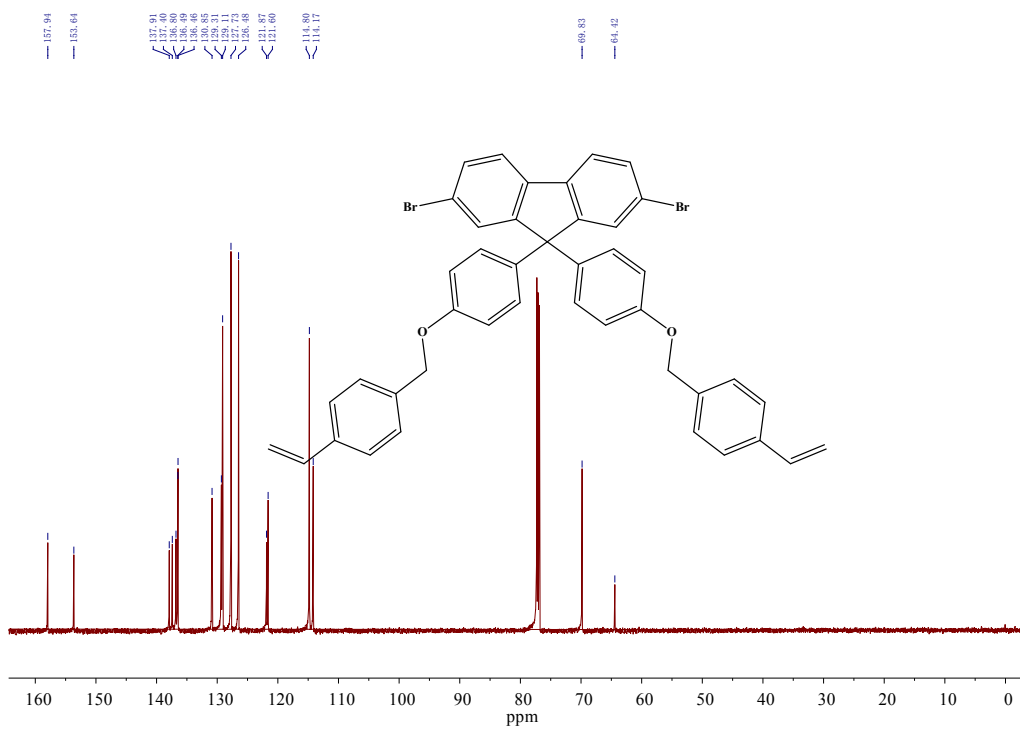

Fig. S10 <sup>13</sup>C-NMR of M3.



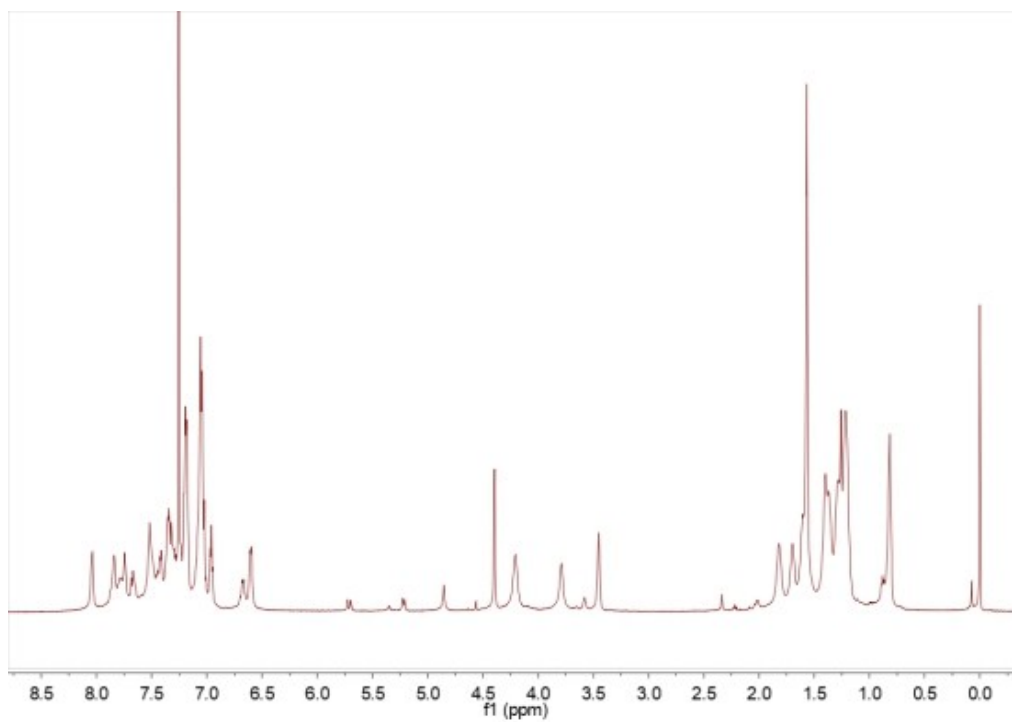

**Fig. S11**  $^1\text{H-NMR}$  of PFCTV10.

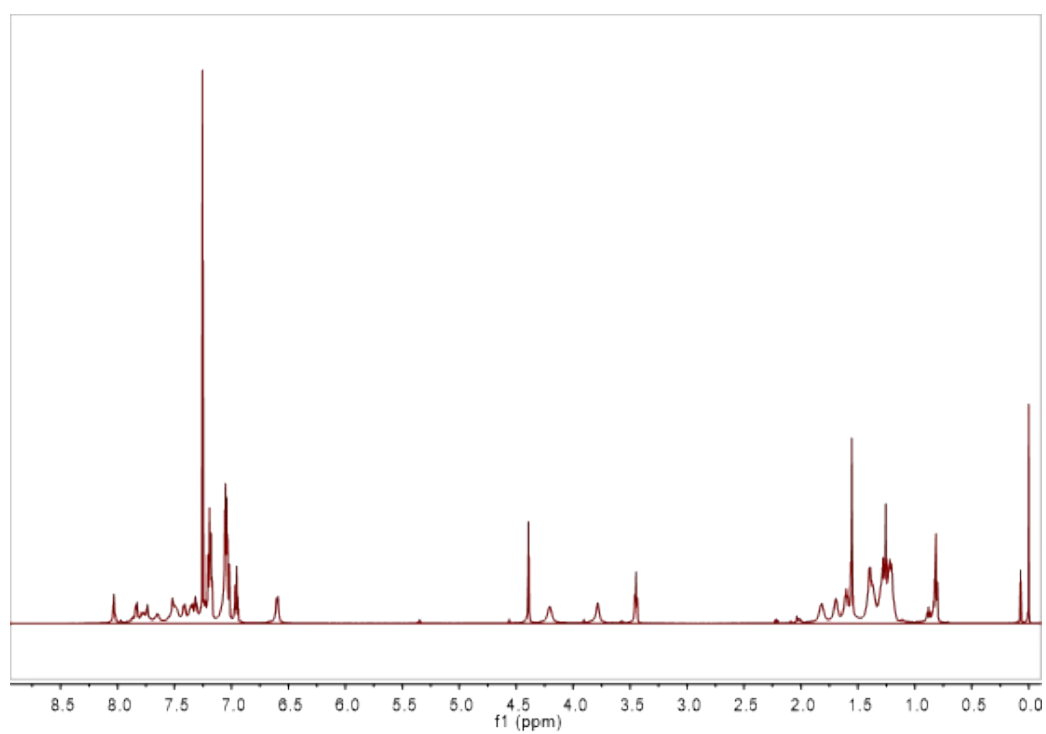

**Fig. S12**  $^1\text{H-NMR}$  of PFCT.

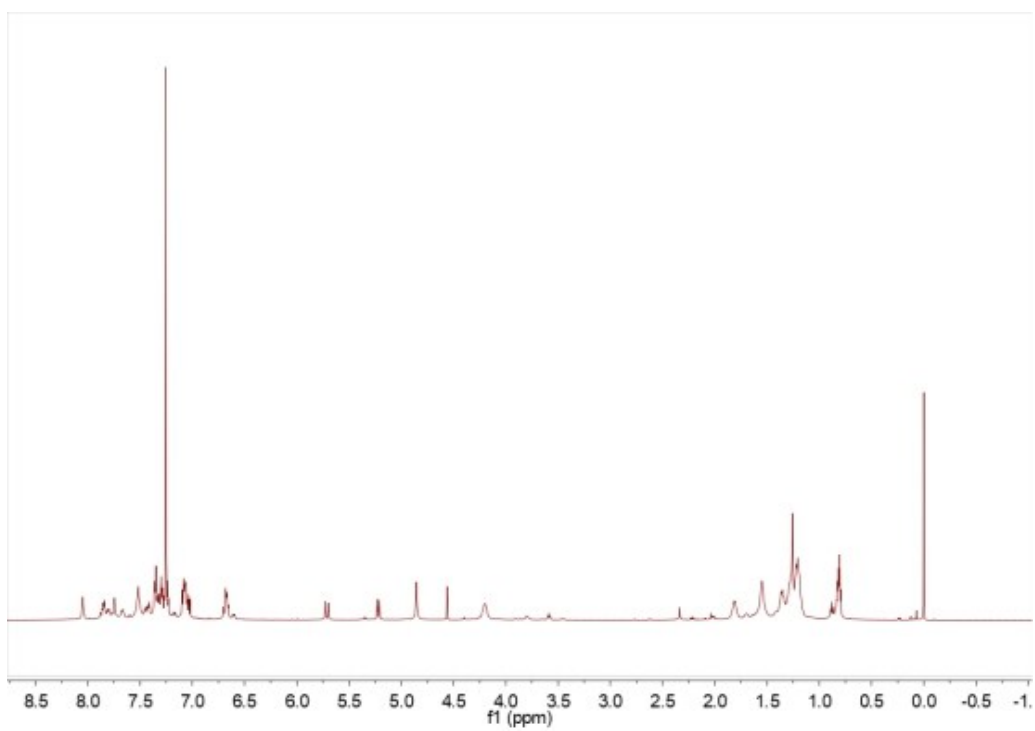

**Fig. S13**  $^1\text{H-NMR}$  of PFCTV20.

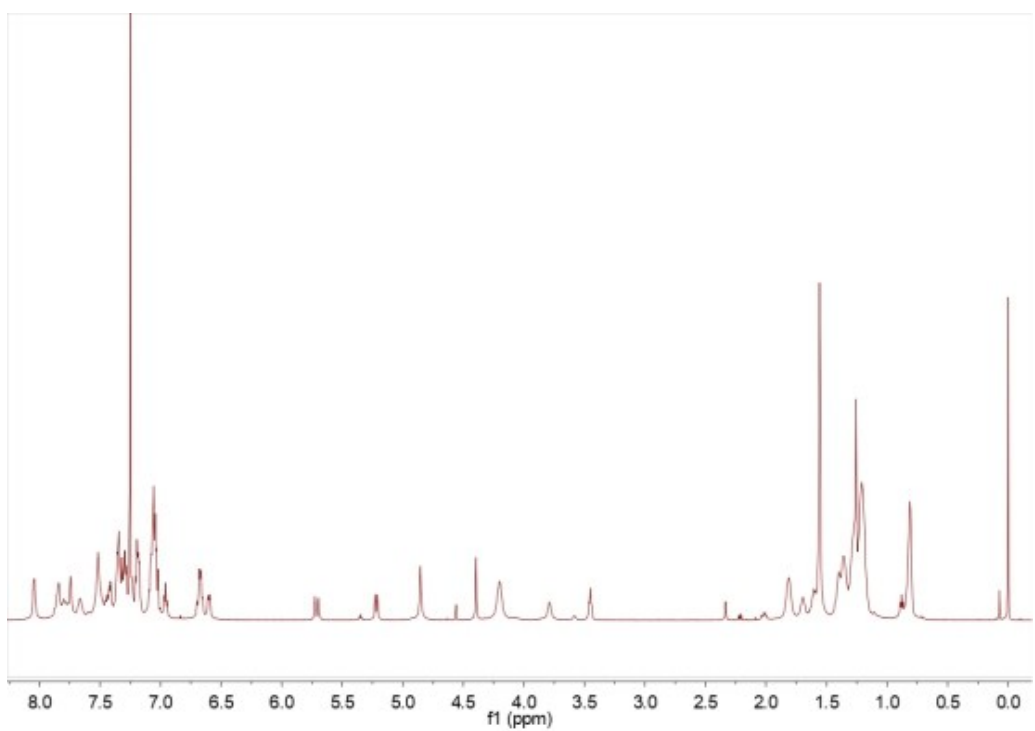

**Fig.S14**  $^1\text{H-NMR}$  of PFCTV30.

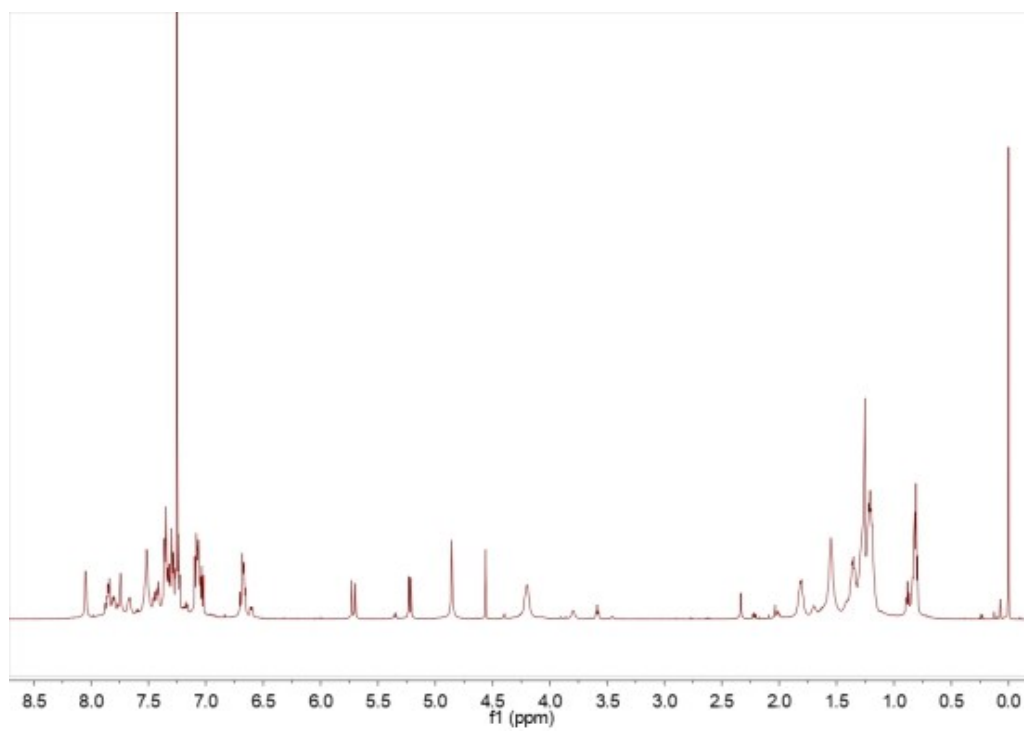

**Fig. S15** <sup>1</sup>H-NMR of PFCTV40.
